# Supplementary material for: Effects of drinking hydrogen-rich water on the quality of life of patients treated with radiotherapy for liver tumors
Source: Springer Nature journal article supplement (doi:10.1186/2045-9912-1-11), 2011-01-01
Supplement: 13618_2011_12_MOESM3_ESM.pdf [file 13618_2011_12_MOESM3_ESM.pdf]

Table 1. Patient Characteristics

|    | water   | age | gender | times  | diagnosis                    | isodose curve (%) | total cGy      | volume (cc)     | collimater (cc) | respose | water | age | gender | times | diagnosis                 | isodose curve (%) | total cGy | volume (cc) | collimater (cc) | respose |
|----|---------|-----|--------|--------|------------------------------|-------------------|----------------|-----------------|-----------------|---------|-------|-----|--------|-------|---------------------------|-------------------|-----------|-------------|-----------------|---------|
| 1  | placebo | 76  | M      | 3<br>3 | HCC                          | 80<br>75          | 3,900<br>3,900 | 2.521<br>2.746  | 7.5<br>7.5      | SD      | HW    | 52  | M      | 3     | liver meta of colon ca    | 74                | 3,600     | 12.283      | 15              | SD      |
| 2  | placebo | 82  | M      | 1      | HCC                          | 70                | 1,200          | 11.769          | 20              | CR      | HW    | 56  | M      | 3     | liver meta of colon ca    | 85                | 3,600     | 2.552       | 12.5            | PR      |
| 3  | placebo | 57  | F      | 3      | bile duct ca                 | 80                | 3,000          | 40.334          | 30              | PR      | HW    | 77  | F      | 3     | liver meta of colon ca    | 75                | 3,000     | 107.136     | 20              | CR      |
| 4  | placebo | 47  | F      | 9      | liver meta. of sarcoma       | 80<br>82          | 3,600<br>3,600 | 10.628<br>6.542 | 25<br>20        | SD      | HW    | 57  | M      | 3     | HCC                       | 70                | 3,600     | 47.679      | 15              | SD      |
| 5  | placebo | 50  | F      | 3      | liver meta of colon ca       | 80                | 3,900          | 16.237          | 20              | SD      | HW    | 66  | M      | 3     | HCC                       | 80                | 3,600     | 16.216      | 25              | PR      |
| 6  | placebo | 21  | F      | 3      | liver meta. of ovarian ca    | 85                | 3,600          | 29.398          | 30              | CR      | HW    | 57  | M      | 3     | HCC                       | 80                | 3,600     | 35.303      | 30              | SD      |
| 7  | placebo | 65  | M      | 3      | liver meta. of rectal ca     | 70                | 3,000          | 182.871         | 40              | PR      | HW    | 47  | M      | 3     | HCC                       | 77                | 3,000     | 17.65       | 20              | CR      |
| 8  | placebo | 73  | M      | 3      | liver meta. of rectal ca     | 75                | 3,600          | 37.937          | 20              | PR      | HW    | 49  | M      | 3     | HCC                       | 80                | 3,300     | 53.578      | 12.5            | PR      |
| 9  | placebo | 58  | M      | 3      | liver meta. of pancreatic ca | 75                | 3,000          | 65.637          | 35              | CR      | HW    | 71  | F      | 3     | HCC                       | 85                | 3,000     | 3.861       | 10              | SD      |
| 10 | placebo | 64  | M      | 3      | HCC                          | 70                | 3,000          | 140.136         | 20              | PR      | HW    | 45  | M      | 3     | HCC                       | 80                | 3,600     | 28.286      | 15              | SD      |
| 11 | placebo | 65  | F      | 3      | HCC                          | 70                | 3,600          | 48.645          | 25              | SD      | HW    | 45  | F      | 3     | liver meta. of gastric ca | 85                | 3,000     | 38.938      | 15              | PR      |
| 12 | placebo | 80  | M      | 3      | HCC                          | 80                | 3,000          | 209.954         | 25              | SD      | HW    | 56  | F      | 3     | Adrenal metastasis of HCC | 80                | 3,600     | 9.494       | 15              | PR      |
| 13 | placebo | 56  | M      | 3      | HCC                          | 85                | 3,600          | 15.365          | 15              | CR      | HW    | 49  | M      | 3     | Adrenal metastasis of HCC | 75                | 3,000     | 91.223      | 20              | SD      |
| 14 | placebo | 61  | F      | 3      | HCC                          | 70                | 3,000          | 98.957          | 30              | SD      | HW    | 60  | M      | 3     | LN metastasis of HCC      | 75                | 3,000     | 120.366     | 25              | SD      |
| 15 | placebo | 46  | M      | 3      | HCC                          | 80                | 3,000          | 20.848          | 25              | CR      | HW    | 47  | M      | 3     | LN metastasis of HCC      | 80                | 3,000     | 80.459      | 25              | SD      |
| 16 | placebo | 70  | F      | 3      | HCC                          | 85                | 3,600          | 16.908          | 20              | PR      | HW    | 50  | M      | 3     | HCC                       | 75                | 3,600     | 29.422      | 20              | SD      |
| 17 | placebo | 44  | M      | 3      | HCC                          | 85                | 3,600          | 16.612          | 30              | SD      | HW    | 49  | F      | 3     | HCC                       | 70                | 3,000     | 156.289     | 40              | PR      |
| 18 | placebo | 48  | M      | 3      | HCC                          | 85                | 3,000          | 35.093          | 20              | SD      | HW    | 63  | F      | 3     | HCC                       | 75                | 3,900     | 5.425       | 20              | SD      |
| 19 | placebo | 76  | F      | 3      | HCC                          | 85                | 3,600          | 5.75            | 15              | SD      | HW    | 51  | M      | 3     | HCC                       | 70                | 4,000     | 28.637      | 35              | SD      |
| 20 | placebo | 60  | M      | 3      | HCC                          | 83                | 3,600          | 6.802           | 12.5            | SD      | HW    | 67  | F      | 3     | HCC                       | 80                | 3,600     | 20.122      | 20              | PR      |
| 21 | placebo | 77  | M      | 3      | HCC                          | 75                | 3,300          | 33.282          | 25              | PR      | HW    | 56  | M      | 3     | HCC                       | 70                | 3,600     | 23.5        | 20              | CR      |
| 22 | placebo | 55  | M      | 3      | HCC                          | 83                | 3,600          | 11.963          | 20              | SD      | HW    | 78  | F      | 3     | HCC                       | 83                | 3,600     | 26.456      | 25              | SD      |
| 23 | placebo | 57  | M      | 3      | HCC                          | 70                | 3,000          | 75.782          | 40              | SD      | HW    | 56  | M      | 3     | HCC                       | 77                | 3,600     | 31.908      | 20              | CR      |
| 24 | placebo | 65  | M      | 2      | HCC                          | 75                | 3,000          | 55.191          | 25              | SD      | HW    | 60  | M      | 3     | HCC                       | 70                | 3,600     | 36.479      | 30              | PR      |
|    |         |     |        |        |                              |                   |                |                 |                 |         | HW    | 70  | M      | 3     | HCC                       | 76                | 3,600     | 63.434      | 40              | SD      |

M: male, F: female, HCC: hepatocellular carcinoma, NR: no response, PR: partial response, CR: complete response

Table 2. Changes in liver function tests

|                           | Placebo      |              |              | Hydrogen water |              |              |
|---------------------------|--------------|--------------|--------------|----------------|--------------|--------------|
|                           | all (n=25)   | male (n=17)  | female (n=8) | all (n=25)     | male (n=16)  | female (n=9) |
| AST(IU/L)                 |              |              |              |                |              |              |
| Week 0                    | 24.8 ± 9.1   | 25.6 ± 5.7   | 23.1 ± 10.4  | 25.3 ± 6.7     | 25.9 ± 5.3   | 23.9 ± 8.3   |
| Week 6                    | 26.3 ± 6.7   | 26.9 ± 7.1   | 25.4 ± 6.8   | 26.8 ± 8.2     | 27.2 ± 9.9   | 26.4 ± 5.1   |
| ALT(IU/L)                 |              |              |              |                |              |              |
| Week 0                    | 27.4 ± 15    | 28.1 ± 11    | 26.5 ± 17    | 26.9 ± 8.7     | 27.1 ± 6.7   | 26.7 ± 10.3  |
| Week 6                    | 28.8 ± 14    | 28.7 ± 16    | 27.6 ± 12    | 28.1 ± 6.5     | 28.8 ± 7.3   | 27.6 ± 9.9   |
| γ-GPT(IU/L)               |              |              |              |                |              |              |
| Week 0                    | 61.9 ± 54.3  | 62.3 ± 35.6  | 60.5 ± 64.7  | 62.3 ± 26.2    | 62.1 ± 34.8  | 62.4 ± 47.9  |
| Week 6                    | 62.8 ± 22.8  | 63.2 ± 16.5  | 62.7 ± 25.9  | 63.6 ± 36.2    | 63.9 ± 54.2  | 63.2 ± 27.4  |
| Total Cholesterol (mg/dL) |              |              |              |                |              |              |
| Week 0                    | 195.2 ± 32.5 | 192.4 ± 48.3 | 199.3 ± 28.6 | 205.6 ± 42.4   | 207.5 ± 57.6 | 204.3 ± 38.6 |
| Week 6                    | 202.8 ± 45.6 | 203.4 ± 36.5 | 200.6 ± 57.2 | 208.4 ± 36.8   | 209.1 ± 28.1 | 207.6 ± 41.8 |

Table.3 Peripheral blood cell counts

|                                                       | Placebo      |              |              | Hydrogen water |              |              |
|-------------------------------------------------------|--------------|--------------|--------------|----------------|--------------|--------------|
|                                                       | all (n=25)   | male (n=17)  | female (n=8) | all (n=25)     | male (n=16)  | female (n=9) |
| The number of leukocytes ( $\times 10^2$ / $\mu$ L)   |              |              |              |                |              |              |
| Week 0                                                | 55.8 ± 15.6  | 58.5 ± 12.7  | 52.8 ± 16.4  | 56.2 ± 16.7    | 57.3 ± 17.2  | 55.4 ± 15.1  |
| Week 6                                                | 53.9 ± 21.4  | 54.1 ± 22.7  | 53.7 ± 19.8  | 54.7 ± 28.7    | 55.1 ± 31.2  | 53.8 ± 19.4  |
| The number of erythrocytes ( $\times 10^4$ / $\mu$ L) |              |              |              |                |              |              |
| Week 0                                                | 474.2 ± 38.3 | 492.3 ± 45.8 | 460.8 ± 30.5 | 482.5 ± 42.1   | 496.6 ± 50.7 | 472.9 ± 36.4 |
| Week 6                                                | 462.1 ± 52.4 | 473.8 ± 42.1 | 456.4 ± 62.2 | 479.5 ± 36.5   | 486.4 ± 29.4 | 470.7 ± 40.5 |
| The number of thrombocytes ( $\times 10^4$ / $\mu$ L) |              |              |              |                |              |              |
| Week 0                                                | 25.7 ± 6.5   | 26.4 ± 4.7   | 24.7 ± 5.9   | 26.4 ± 7.1     | 26.9 ± 5.5   | 26.1 ± 4.8   |
| Week 6                                                | 24.5 ± 4.7   | 25.9 ± 2.8   | 23.4 ± 6.4   | 25.7 ± 4.8     | 26.1 ± 4.7   | 25.3 ± 3.9   |
