# Supplementary figures and images for: Effects of drinking hydrogen-rich water on the quality of life of patients treated with radiotherapy for liver tumors
Source: Springer Nature journal article supplement (doi:10.1186/2045-9912-1-11), 2011-01-01

A

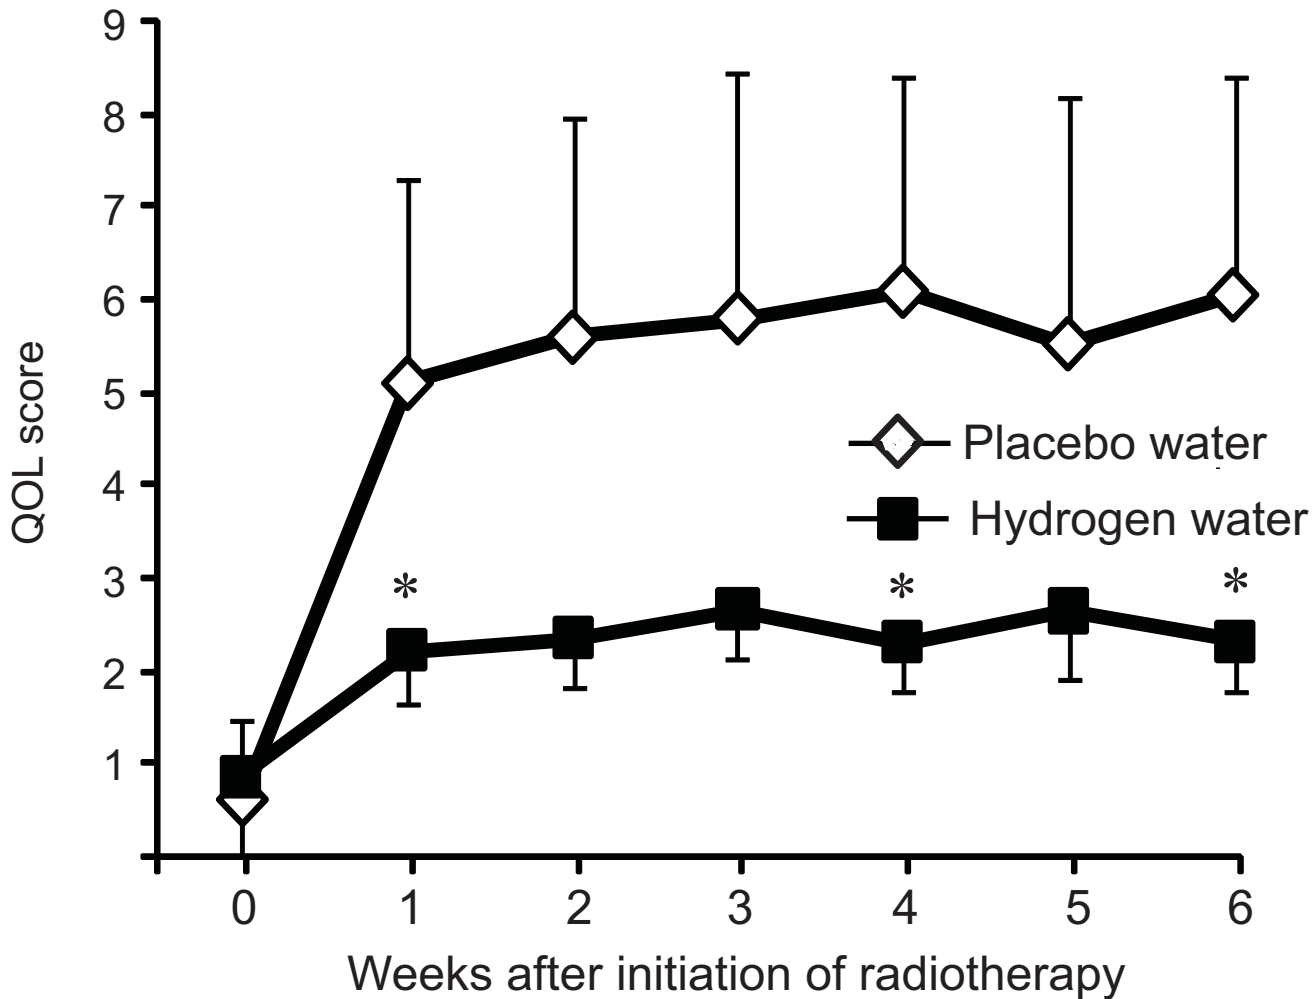

B

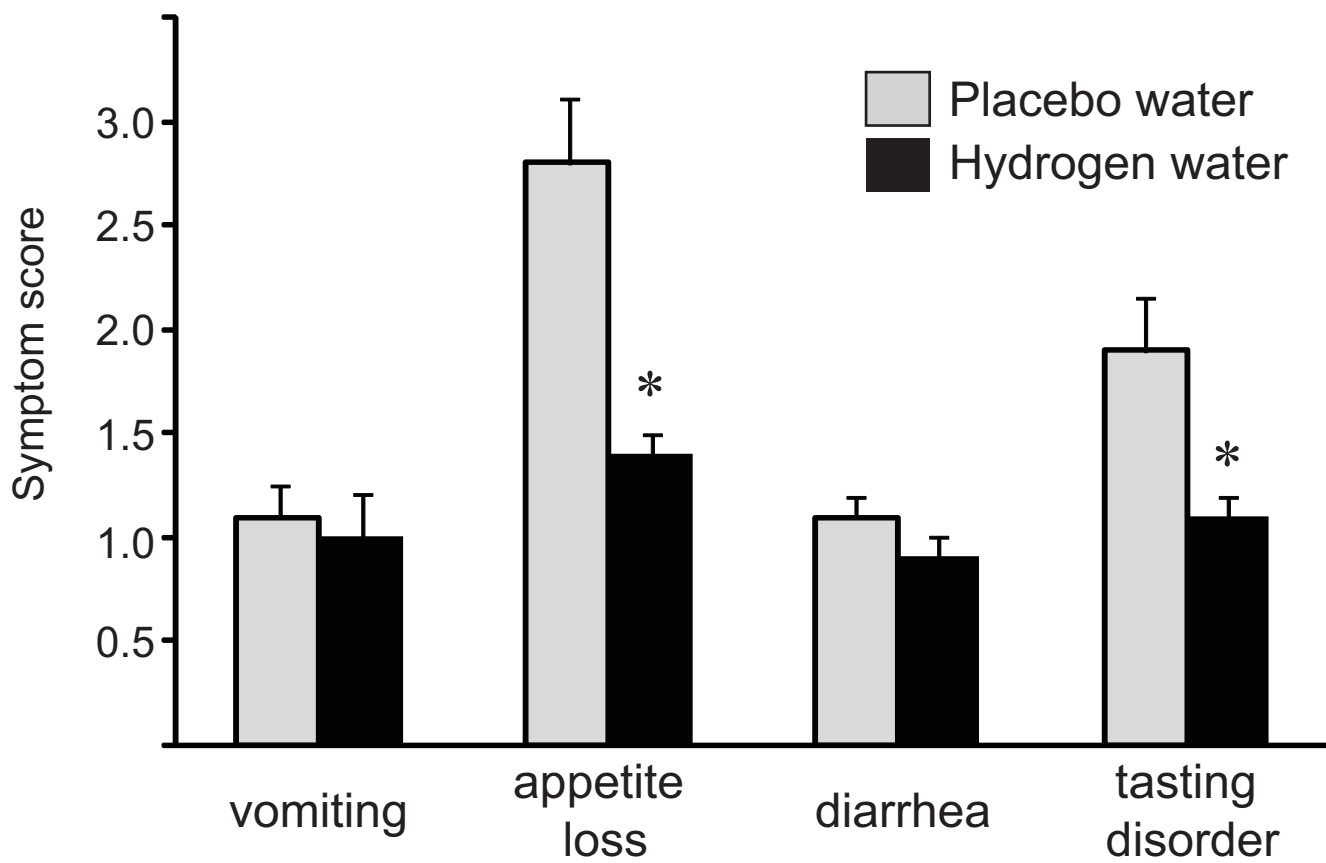

Supplement: 13618_2011_12_MOESM1_ESM.pdf [file 13618_2011_12_MOESM1_ESM.pdf]
